# Supplementary material for: Influence of Canteens on the Eating Behavior of Private School Students
Source: Preprints.org preprint supplement (doi:10.20944/preprints202404.1292.v1), 2024-04-19
Supplement: Supplementary file 1 [file supplementary]

**Supplementary material.**

**Profiles of the canteens evaluated in this study according to latent class analysis.**

| **Variable** | **Profile 1** | **Profile 2** | **Profile 3** | **Profile 4** |
| --- | --- | --- | --- | --- |
| Presence of nutritionist | **0.75** | 0.47 | 0.14 | **0.66** |
| Breakfast | **0.81** | **1.00** | **1.00** | **1.00** |
| Lunch | **0.63** | **1.00** | **0.57** | **1.00** |
| Dinner | **1.00** | **1.00** | **0.86** | **1.00** |
| Food production in the canteen | **0.69** | **0.74** | 0.29 | 0.14 |
| Food production in an employee's home | **0.75** | **1.00** | **0.86** | **0.97** |
| Food production in the production center | **0.81** | 0.42 | **0.86** | **1.00** |
| Food production in the seller's home | 0.44 | **0.90** | **1.00** | **1.00** |
| Food production in the factory | **0.88** | **0.84** | 0.43 | 0.14 |
| Coffee menu availability | **0.81** | **1.00** | **1.00** | **1.00** |
| Lunch menu availability | **0.69** | **1.00** | **0.57** | **0.97** |
| Snack menu availability | 0.31 | 0.00 | 0.29 | 0.03 |
| Price availability | 0.25 | **0.84** | **0.71** | **0.52** |
| Availability of food for special purposes | **0.81** | 0.21 | 0.29 | **1.00** |
| Table availability | 0.31 | **0.53** | 0.00 | 0.34 |
| Sugar availability | **0.94** | **1.00** | **0.57** | **1.00** |
| Sweetener availability | **0.94** | **1.00** | 0.43 | **1.00** |
| Salt availability | **1.00** | **1.00** | **0.71** | **1.00** |
| Availability of ultra-processed sauce | **0.56** | **0.58** | 0.00 | 0.38 |
| Choosing food based on the student's preference | 0.00 | 0.26 | 0.14 | 0.00 |
| Choosing food based on production possibilities | 0.13 | 0.16 | 0.14 | **1.00** |
| Choosing foods based on the possibility of sale | 0.19 | **0.58** | 0.14 | 0.03 |
| Choosing foods based on make a profit | 0.44 | **0.63** | **0.57** | 0.17 |
| Choosing foods based on school recommendations | 0.37 | 0.00 | 0.00 | **0.72** |
| Choosing foods based on nutritionist recommendations | **0.75** | 0.47 | 0.14 | **0.62** |
| Choosing food based on legislation | **0.87** | 0.21 | 0.14 | **1.00** |
| Payment by cash | 0.06 | 0.00 | 0.00 | 0.00 |
| Payment by debit card | 0.38 | 0.26 | 0.14 | 0.00 |
| Payment by credit card | 0.38 | 0.47 | **0.57** | 0.00 |
| Payment by canteen card | **0.81** | **0.79** | **0.86** | **1.00** |
| Payment by pix | 0.00 | 0.05 | 0.00 | 0.00 |
| Payment for meal voucher | **1.00** | **0.95** | **1.00** | **1.00** |
| Payment by application | **0.94** | **0.95** | **1.00** | **1.00** |
| Payment on account | 0.19 | **0.95** | **0.71** | **0.86** |
| Nutritional Education Actions | **0.75** | **0.95** | **0.57** | **1.00** |
| Availability of material on healthy eating | **0.94** | **0.89** | 0.43 | **1.00** |
| Material prepared by the canteen | **0.94** | **0.95** | 0.43 | **1.00** |
| Material prepared by the nutritionist | **1.00** | **1.00** | **0.57** | **1.00** |
| Material prepared by management | **1.00** | **0.95** | **0.86** | **1.00** |
| Material created by students | **1.00** | **0.95** | **1.00** | **1.00** |
| Prohibition of food sales | 0.19 | **1.00** | **0.71** | **1.00** |
| Meal availability | **0.69** | **1.00** | **0.57** | **1.00** |
| Food combo availability | **0.88** | **1.00** | **0.57** | **1.00** |
| Food promotion availability | **0.75** | **0.95** | 0.43 | **1.00** |
| Food sales by other people at the school | **0.94** | **1.00** | **0.71** | **1.00** |
